# Supplementary material
Source: HighWire-hosted journal article supplement (https://erj.ersjournals.com/content/55/5/1901747)
Supplement: inline-supplementary-material-1 [file inline-supplementary-material-1.pdf]

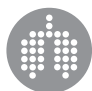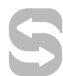

SHAREABLE PDF

# Physiological predictors of survival in patients with sarcoidosis-associated pulmonary hypertension: results from an international registry

Oksana A. Shlobin<sup>1</sup>, Vasilis Kouranos<sup>2</sup>, Scott D. Barnett<sup>1</sup>, Esam H. Alhamad<sup>3</sup>, Daniel A. Culver<sup>4</sup>, Joseph Barney<sup>5</sup>, Francis C. Cordova<sup>6</sup>, Eva M. Carmona<sup>7</sup>, Mary Beth Scholand<sup>8</sup>, Marlies Wijsenbeek<sup>9</sup>, Sivagini Ganesh<sup>10</sup>, Elyse E. Lower<sup>11</sup>, Peter J. Engel<sup>12</sup>, John Wort<sup>2</sup>, Laura Price<sup>2</sup>, Athol U. Wells<sup>2</sup>, Steven D. Nathan<sup>1</sup> and Robert P. Baughman<sup>11</sup>

**Affiliations:** <sup>1</sup>INOVA Fairfax Hospital, Falls Church, VA, USA. <sup>2</sup>Royal Brompton Hospital, London, UK. <sup>3</sup>King Saud University, Riyadh, Saudi Arabia. <sup>4</sup>Cleveland Clinic, Cleveland, OH, USA. <sup>5</sup>University of Alabama, Birmingham, AL, USA. <sup>6</sup>Temple University, Philadelphia, PA, USA. <sup>7</sup>Mayo Clinic, Rochester, MN, USA. <sup>8</sup>University of Utah, Salt Lake City, UT, USA. <sup>9</sup>Erasmus University Medical Centre, Rotterdam, The Netherlands. <sup>10</sup>University of Southern California, Los Angeles, CA, USA. <sup>11</sup>University of Cincinnati Medical Center, Cincinnati, OH, USA. <sup>12</sup>The Christ Hospital, Cincinnati, OH, USA.

**Correspondence:** Oksana A. Shlobin, Pulmonary Hypertension Program, Inova Fairfax Hospital, 3300 Gallows Road, Falls Church VA 22042, USA. E-mail: oksana.shlobin@inova.org

@ERSpublications

**Decreased 6-min walk distance and reduced diffusion capacity are associated with decreased survival in patients with sarcoidosis-associated pulmonary hypertension** <http://bit.ly/2UQfWJh>

**Cite this article as:** Shlobin OA, Kouranos V, Barnett SD, *et al.* Physiological predictors of survival in patients with sarcoidosis-associated pulmonary hypertension: results from an international registry. *Eur Respir J* 2020; 55: 1901747 [https://doi.org/10.1183/13993003.01747-2019].

This single-page version can be shared freely online.

## ABSTRACT

**Introduction:** Sarcoidosis-associated pulmonary hypertension (SAPH) is associated with reduced survival in single-centre studies. The international Registry for SAPH (ReSAPH) with long-term follow-up was established to enrich our knowledge of this complication of sarcoidosis. This analysis aims to elucidate factors associated with reduced transplant-free survival in SAPH patients.

**Methods:** ReSAPH contains prospectively collected outcomes of SAPH patients since the time of registry enrolment. Information analysed includes right heart catheterisation data, pulmonary function testing, chest radiography, Scadding stage and 6-min walk distance (6MWD), among others. Cox regression models were used to identify independent predictors of transplant-free survival.

**Results:** Data from 215 patients followed for a mean±SD 2.5±1.9 years were available for analysis. In the 159 precapillary patients, the Kaplan–Meier-adjusted 1-, 3- and 5-year transplant-free survival was 89.2%, 71.7% and 62.0%, respectively. Kaplan–Meier-adjusted 1-, 3- and 5-year transplant-free survival in the incident group was 83.5%, 70.3% and 58.3%, respectively, and in the prevalent group was 94.7%, 72.2% and 66.3%, respectively. Patients with reduced diffusing capacity of the lung for carbon monoxide ( $D_{LCO}$ ) (<35% predicted) and 6MWD <300 m in the precapillary cohort had significantly worse transplant-free survival. Reduced 6MWD and preserved forced expiratory volume (FEV<sub>1</sub>)/forced vital capacity (FVC) ratio were identified as independent risk factors for reduced transplant-free survival in the precapillary cohort.

**Conclusion:** Reduced  $D_{LCO}$  (<35% pred) and 6MWD (<300 m) at the time of registry enrolment were

associated with reduced transplant-free survival in the overall precapillary cohort. Preserved FEV<sub>1</sub>/FVC ratio was identified as an independent risk factor for worsened outcomes.
